# Supplementary material
Source: publisher site journal article supplement (https://www.dovepress.com/article/395942)
Supplement: Supplementary file 1 [file get_supplementary_file.php]

Supplementary Table 1 MLST typing of GBS strains from 102 pregnant women and 3 neonates

| No. of strains from pregnant women | CC | ST typing |
| --- | --- | --- |
| 38 | CC19 | 19 |
| 46 | CC19 | 19 |
| 126 | CC19 | 19 |
| 189 | CC19 | 19 |
| 281 | CC19 | 19 |
| 397 | CC19 | 19 |
| 408 | CC19 | 19 |
| 540 | CC19 | 19 |
| 590 | CC19 | 19 |
| 627 | CC19 | 19 |
| 678 | CC19 | 19 |
| 691 | CC19 | 19 |
| 695 | CC19 | 19 |
| 695baby | CC19 | 19 |
| 715 | CC19 | 19 |
| 767 | CC19 | 19 |
| 775 | CC19 | 19 |
| 776 | CC19 | 19 |
| 832 | CC19 | 19 |
| 850 | CC19 | 19 |
| 869 | CC19 | 19 |
| 905 | CC19 | 19 |
| 921 | CC19 | 19 |
| 974 | CC19 | 19 |
| 977 | CC19 | 19 |
| 990 | CC19 | 19 |
| 1004 | CC19 | 19 |
| 1019 | CC19 | 19 |
| 1031 | CC19 | 19 |
| 1303 | CC19 | 19 |
| 1470 | CC19 | 19 |
| 875 | CC19 | 193 |
| 115 | CC10 | 10 |
| 139 | CC10 | 10 |
| 447 | CC10 | 10 |
| 460 | CC10 | 10 |
| 489 | CC10 | 10 |
| 511 | CC10 | 10 |
| 556 | CC10 | 10 |
| 644 | CC10 | 10 |
| 675 | CC10 | 10 |
| 682 | CC10 | 10 |
| 684 | CC10 | 10 |
| 690 | CC10 | 10 |
| 1282 | CC10 | 10 |
| 1316 | CC10 | 10 |
| 1495 | CC10 | 10 |
| 56 | CC10 | 12 |
| 102 | CC10 | 12 |
| 264 | CC10 | 12 |
| 853 | CC10 | 12 |
| 1292 | CC10 | 12 |
| 1389 | CC10 | 12 |
| 1459 | CC10 | 12 |
| 835 | CC10 | 8 |
| 1127 | CC10 | 8 |
| 449 | CC10 | 358 |
| 167 | CC10 | 509 |
| 200 | CC17 | 17 |
| 273 | CC17 | 17 |
| 630 | CC17 | 17 |
| 630baby | CC17 | 17 |
| 652 | CC17 | 17 |
| 664 | CC17 | 17 |
| 724 | CC17 | 17 |
| 972 | CC17 | 17 |
| 826 | CC17 | 188 |
| 278 | CC485 | 485 |
| 442 | CC485 | 485 |
| 544 | CC485 | 485 |
| 616 | CC485 | 485 |
| 852 | CC485 | 485 |
| 1302 | CC485 | 862 |
| 1435 | CC485 | 862 |
| 802 | CC890 | 24 |
| 912 | CC890 | 24 |
| 88 | CC890 | 890 |
| 256 | ST1 | 1 |
| 395 | ST1 | 1 |
| 510 | ST1 | 1 |
| 930 | ST1 | 1 |
| 938 | ST1 | 1 |
| 939 | ST1 | 1 |
| 956 | ST1 | 1 |
| 1406 | ST1 | 1 |
| 1436 | ST1 | 1 |
| 1439 | ST1 | 1 |
| 1440 | ST1 | 1 |
| 113 | ST23 | 23 |
| 136 | ST23 | 23 |
| 137 | ST23 | 23 |
| 266 | ST23 | 23 |
| 513 | ST23 | 23 |
| 530 | ST23 | 23 |
| 647 | ST23 | 23 |
| 754 | ST23 | 23 |
| 755 | ST23 | 23 |
| 755baby | ST23 | 23 |
| 1079 | ST23 | 23 |
| 1080 | ST23 | 23 |
| 84 | ST4 | 4 |
| 654 | ST4 | 4 |
| 1288 | ST4 | 4 |
| 1377 | ST651 | 651 |
| 187 | ST929 | 929 |
